# Supplementary material for: Evaluation of a blended care programme for caregivers and working pregnant women to prevent adverse pregnancy outcomes: an intervention study
Source: HighWire-hosted journal article supplement (doi:10.1136/oemed-2020-107191), 2021-04-19
Supplement: oemed-2020-107191supp001_data_supplement.pdf [file oemed-2020-107191supp001_data_supplement.pdf]

## Supplement A

**Figure 1: Description and examples of screenshots of Pregnancy and Work App: Welcome page, Questionnaire page, workadvice pages infectious diseases and stress**

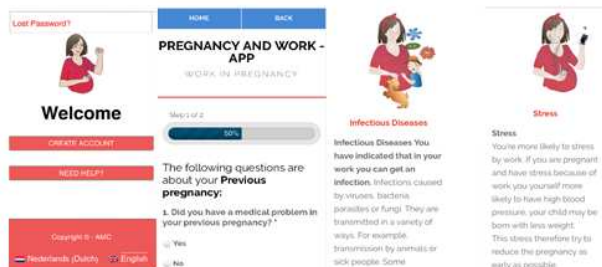

After creating a user account participants answered a few questions in the P&W app about their health, pregnancy and work. Based on these answers, each participant received an e-mail with an individual work advice. The home page of the app provided access to several topics: 'work advice', 'legal issues and tips for consultation', 'baby messages' about the growth of the unborn baby and 'more information'. The P&W app also contained a page for (obstetrical) caregivers, with all advices, classified by risk factor. At 20 weeks pregnancy users of the P&W app were asked to answer a few questions again, to check whether working conditions and health had changed. Participants received an adjusted work advice via the app and by e-mail if necessary. The P&W app is described in more detail in our previous study [18].
