# Supplementary material for: Evaluation of a blended care programme for caregivers and working pregnant women to prevent adverse pregnancy outcomes: an intervention study
Source: HighWire-hosted journal article supplement (doi:10.1136/oemed-2020-107191), 2021-04-19
Supplement: oemed-2020-107191supp003_data_supplement.pdf [file oemed-2020-107191supp003_data_supplement.pdf]

| <b>Table 2: Baseline characteristics (complete results)</b> | <b>Intervention group n (%)</b> | <b>Control group n (%)</b> | <b>P/ RR (95% CI)</b> |
|-------------------------------------------------------------|---------------------------------|----------------------------|-----------------------|
| <b>N</b>                                                    | <b>119</b>                      | <b>122</b>                 |                       |
| <b>General details</b>                                      |                                 |                            |                       |
| Age, years (mean, sd)                                       | 32 (5)                          | 33 (4)                     | NS                    |
| Ethnic origin                                               |                                 |                            |                       |
| • Caucasian                                                 | 102 (86)                        | 110 (90)                   | NS                    |
| • Other                                                     | 17 (14)                         | 12 (10)                    | NS                    |
| Educational level                                           |                                 |                            |                       |
| • University education or higher academic                   | 69 (58)                         | 68 (56)                    | ref                   |
| • Higher professional education                             | 35 (29)                         | 33 (27)                    | NS                    |
| • Senior secondary vocational education                     | 15 (13)                         | 21 (17)                    | NS                    |
| Language Questionnaires English                             | 0                               | 4 (3)                      | NS                    |
| <b>General Health, lifestyle</b>                            |                                 |                            |                       |
| Weight kg (mean, sd)                                        | (* 1 unknown) 66.97 (SD 10.49)* | 65,64 (SD 11.03)           | NS                    |
| Length/ weight cm (mean, sd)                                | 170,6 (SD 6.49)                 | 168.93 (SD 7.28)           | NS                    |
| Body Mass Index (kg/m <sup>2</sup> ; mean, sd)              | (* 1 unknown) 23 (3.7) *        | 22.9 (SD 3.1)              | NS                    |
| Body Mass Index (kg/m <sup>2</sup> ) > 25                   | 22 (19%)                        | 14 (12%)                   | NS                    |
| Health complaints/ chronic illness before pregnancy: Yes    | 10 (8)                          | 10 (8)                     | NS                    |
| Medication                                                  |                                 |                            |                       |
| • No                                                        | 92 (77)                         | 100 (82)                   | ref                   |
| • Yes, medication prescribed by physician                   | 18 (15)                         | 17 (14)                    | NS                    |
| • Yes, not prescribed by physician                          | 9 (8)                           | 5 (4)                      | NS                    |
| Smoking                                                     |                                 |                            |                       |
| • non-smoker                                                | 75 (63)                         | 85 (69)                    | NS                    |
| • quitted before pregnancy                                  | 33 (28)                         | 25 (21)                    | ref                   |
| • quitted because of pregnancy                              | 11 (9)                          | 10 (8)                     | NS                    |
| • current                                                   | 0                               | 2 (2)                      | NS                    |
| Alcohol                                                     |                                 |                            |                       |
| • no                                                        | 33 (28)                         | 38 (31)                    | ref                   |
| • sometimes                                                 | 82 (69)                         | 82 (67)                    | NS                    |
| • ≤1/day                                                    | 4 (3)                           | 1 (1)                      | NS                    |
| • yes, 1-5                                                  | 0                               | 1 (1)                      | NS                    |
| Drugs                                                       |                                 |                            |                       |
| • no                                                        | 98 (82)                         | 108 (88)                   | NS                    |
| • quitted before pregnancy or earlier                       | 21 (18)                         | 14 (12)                    | NS                    |
| <b>Current and former pregnancies</b>                       |                                 |                            |                       |
| Current pregnancy                                           |                                 |                            |                       |
| • Naturally (spontaneously, without medical                 | 110 (92)                        | 113 (93)                   | NS                    |
| • With a fertility treatment                                | 9 (8)                           | 9 (7)                      | NS                    |
| • Singleton                                                 | 116 (98)                        | 118 (97)                   | NS                    |
| • Twin of triplet                                           | 3 (3)                           | 4 (3)                      | NS                    |

|                                                      |                  |                  |     |
|------------------------------------------------------|------------------|------------------|-----|
| Parity                                               |                  |                  |     |
| • 0                                                  | 67 (56)          | 60 (49)          | NS  |
| • ≥1                                                 | 52 (44)          | 62 (51)          | NS  |
| Medical problems in former pregnancies?              | 9/52 (17)        | 12/62 (19)       | NS  |
| • High blood pressure, preeclampsia or Hellp         | 2 (2)            | 2 (2)            | NS  |
| • Preterm birth (before 37 weeks of pregnancy)       | 7 (6)            | 10 (8)           | NS  |
| • Low birth weight                                   | 1 (1)            | 0                | NS  |
| • Stillbirth                                         | 2 (2)            | 2 (2)            | NS  |
| • Miscarriage                                        | 18 (15)          | 15 (12)          | NS  |
| Medical problems before current pregnancy?           | 8 (7)            | 8 (7)            | NS  |
| Increase in complaints because of current pregnancy? | 37 (31)          | 39 (32)          | NS  |
| • Complaints of fatigue                              | 34 (29)          | 33 (27)          | NS  |
| • Headaches                                          | 15 (13)          | 11 (9)           | NS  |
| • Pain in the back, pelvis and/or legs               | 19 (16)          | 18 (15)          | NS  |
| • Nausea/vomiting                                    | 16 (13)          | 18 (15)          | NS  |
| • Stomach aches                                      | 9 (8)            | 1 (1)            | **  |
| <hr/>                                                |                  |                  |     |
| <b>Work: General aspects</b>                         |                  |                  |     |
| Paid work                                            |                  |                  |     |
| • Yes from start of the pregnancy                    | 119 (100)        | 122 (100)        | NS  |
| • Yes from ... weeks pregnancy                       | 1 (1) (13 weeks) |                  | NS  |
| Working in sector                                    |                  |                  |     |
| • Health care                                        | 34 (29)          | 32 (26)          | NS  |
| • Business services & research                       | 31 (26)          | 37 (30)          | NS  |
| • Education, Welfare and child care                  | 20 (17)          | 18 (15)          | NS  |
| • Retail & Hotel and catering industry               | 14 (12)          | 16 (13)          | NS  |
| • Government & Culture, recreation                   | 13 (11)          | 11 (9)           | NS  |
| • Other (Industry/NGO's/ transport)                  | 6 (5)            | 8 (7)            | NS  |
| Number of employees in the company                   |                  |                  |     |
| • 1-10                                               | 16 (13)          | 17 (14)          | NS  |
| • 11-50                                              | 22 (19)          | 19 (16)          | NS  |
| • 51-100                                             | 11 (9)           | 14 (12)          | NS  |
| • More than 100                                      | 70 (59)          | 71 (58)          | NS  |
| <b>Commuting</b>                                     |                  |                  |     |
| Travel distance commuting (m/km)                     |                  |                  |     |
|                                                      | <i>1 unknown</i> | <i>1 unknown</i> |     |
| • <5 km                                              | 19 (16)          | 22 (18)          | ref |
| • 5-10 km                                            | 28 (24)          | 26 (21)          | NS  |
| • 10-25 km                                           | 34 (29)          | 31 (25)          | NS  |
| • >25 km                                             | 37 (31)          | 42 (34)          | NS  |
| Travel time commuting (min/hours)                    |                  |                  |     |
| • <1 hour/day                                        | 68 (57)          | 72 (59)          | ref |
| • 1-2 hours/day                                      | 40 (34)          | 38 (31)          | NS  |

|                                |           |           |     |
|--------------------------------|-----------|-----------|-----|
| • >2 hours/day                 | 10 (8)    | 11 (9)    | NS  |
| Means of travelling/ transport | 1 unknown | 1 unknown |     |
| • Walking                      | 2 (2)     | 2 (2)     | NS  |
| • By bicycle/scooter           | 40 (34)   | 39 (32)   | ref |
| • Public transport             | 28 (24)   | 25 (21)   | NS  |
| • Car                          | 48 (40)   | 55 (45)   | NS  |

---

**Private circumstances/conditions**
**Spare time**

|                                        |         |           |     |
|----------------------------------------|---------|-----------|-----|
| Physical activity: sports              |         | 1 unknown |     |
| • normally not participating in sports | 27 (23) | 40 (33)   | NS  |
| • stopped sports when pregnant         | 26 (22) | 24 (20)   | ref |
| • sport (hours/week)                   | 66 (56) | 57 (47)   | NS  |
| ○ <2 hours/week                        | 35 (29) | 33 (27)   | NS  |
| ○ >2 hours/week                        | 31 (26) | 24 (20)   | NS  |
| Hobby spending > 5 hours/week          | 9 (8)   | 7 (6)     | NS  |

**Domestic situation**

|                                        |         |         |     |
|----------------------------------------|---------|---------|-----|
| Children (living at home): Yes         | 41 (35) | 48 (39) | NS  |
| • 1 child                              | 36 (30) | 38 (31) | NS  |
| • ≥ 2 children                         | 5 (4)   | 10 (8)  | NS  |
| Housekeeping                           |         |         |     |
| • Largely doing by participant herself | 23 (19) | 22 (18) | ref |
| • together with partner/someone else   | 84 (71) | 88 (72) | NS  |
| • partner/someone else does most of it | 12 (10) | 11 (9)  | NS  |
| Household help: Yes                    | 39 (33) | 43 (35) | NS  |

\*\* P or FE &lt;0.01

NS= Non significant

ref=Reference

**Table 3: Univariate analysis Work status, work advice and adjustments (complete results)**

|                                    | 16 weeks pregnancy          |                         |      |           |    | 24 weeks pregnancy           |                        |      |           |     | 32 weeks pregnancy         |                        |      |           |    |
|------------------------------------|-----------------------------|-------------------------|------|-----------|----|------------------------------|------------------------|------|-----------|-----|----------------------------|------------------------|------|-----------|----|
|                                    | Intervention group<br>N=119 | Control group<br>N= 122 | RR   | 95% CI    | P  | Intervention group<br>N= 105 | Control group<br>N=117 | RR   | 95% CI    | P   | Intervention Group<br>N=87 | Control group<br>N=101 | RR   | 95% CI    | P  |
| <b>Current work status</b>         |                             |                         |      |           |    |                              |                        |      |           |     |                            |                        |      |           |    |
| Normal working hours               | 118 (99)                    | 122 (98)                |      |           | NS | 89 (85)                      | 100 (86)               | ref  |           |     | 59 (68)                    | 56 (55)                | ref  |           |    |
| Part time due to illness           | 1 (1)                       | 0                       |      |           |    | 8 (8)                        | 8 (7)                  |      |           | NS  | 8 (9)                      | 9 (9)                  |      |           | NS |
| No work due to illness             | 0                           | 0                       |      |           |    | 7 (7)                        | 5 (4)                  |      |           | NS  | 11 (13)                    | 10 (10)                |      |           | NS |
| Pregnancy leave                    | 0                           | 0                       |      |           |    | 1 (1)                        | 4 (3)                  |      |           | NS  | 9 (10)                     | 26 (26)                | 0.42 | 0.21-0.83 | ** |
| <b>Increase complaints</b>         | 37 (31)                     | 39 (32)                 |      |           | NS | 44 (42)                      | 45 (39)                |      |           | NS  | 52 (52)                    | 42 (48)                |      |           | NS |
| <b>Advice to adjust work from:</b> |                             |                         |      |           |    |                              |                        |      |           |     |                            |                        |      |           |    |
| Midwife & Gynecologist             | 11 (9)                      | 2 (2)                   | 5.64 | 1.28-24.9 | ** | 41 (39)                      | 21 (18)                | 2.18 | 1.38-3.43 | *** | 36 (41)                    | 29 (29)                |      |           | NS |
| Occupational physician             | 2 (2)                       | 0                       |      |           | NS | 6 (6)                        | 11 (9)                 |      |           | NS  | 11 (13)                    | 12 (12)                |      |           | NS |
| General practitioner               | 0                           | 0                       |      |           |    | 3 (3)                        | 1 (1)                  |      |           | NS  | 6 (7)                      | 1 (1)                  |      |           | NS |
| Manager                            | 2 (2)                       | 4 (3)                   |      |           | NS | 5 (5)                        | 12 (10)                |      |           | NS  | 8 (9)                      | 15 (15)                |      |           | NS |
| Staff advisor                      | 0                           | 2 (2)                   |      |           | NS | 1 (1)                        | 2 (2)                  |      |           | NS  | 2 (2)                      | 4 (4)                  |      |           | NS |
| Own initiative                     | 11 (9)                      | 16 (13)                 |      |           | NS | 21 (20)                      | 30 (26)                |      |           | NS  | 31 (36)                    | 29 (29)                |      |           | NS |
| Other                              | 0                           | 5 (4)                   |      |           | NS | 6 (6)                        | 4 (4)                  |      |           | NS  | 9 (9)                      | 2 (2)                  |      |           | NS |
| <b>Work adjustments?</b>           | 17 (14)                     | 22 (18)                 |      |           | NS | 22 (21)                      | 37 (32)                |      |           | NS  | 32 (37)                    | 45 (45)                |      |           | NS |
| Less physically demanding work     | 4 (3)                       | 7 (6)                   |      |           | NS | 2 (2)                        | 9 (8)                  |      |           | NS  | 10 (12)                    | 13 (13)                |      |           | NS |
| Less standing or walking           | 4 (3)                       | 9 (7)                   |      |           | NS | 6 (6)                        | 6 (5)                  |      |           | NS  | 11 (13)                    | 11 (11)                |      |           | NS |
| Lifting or carrying less           | 5 (4)                       | 7 (5)                   |      |           | NS | 6 (6)                        | 8 (7)                  |      |           | NS  | 9 (10)                     | 9 (9)                  |      |           | NS |
| Slower work pace                   | 2 (2)                       | 1 (1)                   |      |           | NS | 4 (4)                        | 2 (2)                  |      |           | NS  | 6 (7)                      | 7 (7)                  |      |           | NS |
| Less work                          | 3 (3)                       | 1 (1)                   |      |           | NS | 4 (4)                        | 5 (4)                  |      |           | NS  | 9 (10)                     | 8 (8)                  |      |           | NS |
| Other working hours                | 3 (2)                       | 5 (4)                   |      |           | NS | 2(2)                         | 5(4)                   |      |           | NS  | 8 (9)                      | 5 (5)                  |      |           | NS |
| Less hours a day                   | 5 (4)                       | 6 (5)                   |      |           | NS | 8 (8)                        | 12 (10)                |      |           | NS  | 19 (22)                    | 15 (15)                |      |           | NS |
| No more night shifts               | 2 (2)                       | 4 (3)                   |      |           | NS | 2 (2)                        | 7 (6)                  |      |           | NS  | 4 (5)                      | 8 (8)                  |      |           | NS |
| Plan work yourself                 | 3 (3)                       | 2 (2)                   |      |           | NS | 1 (1)                        | 2 (2)                  |      |           | NS  | 4 (5)                      | 4 (4)                  |      |           | NS |
| More working from home             | 5 (4)                       | 7 (6)                   |      |           | NS | 3 (3)                        | 10 (9)                 |      |           | NS  | 8 (9)                      | 10 (10)                |      |           | NS |

\* P or FE &lt; 0.05, \*\* P or FE &lt; 0.01, \*\*\* P &lt; 0.001.

NS= Non significant

NA= not applicable, not in Questionnaire 1 (16 weeks pregnancy)

Table 4: Univariate analysis Working conditions (complete results)

|                                        | 16 weeks pregnancy          |                        | RR   | 95% CI    | P   | 24 weeks pregnancy         |                        | RR   | 95% CI    | P  |
|----------------------------------------|-----------------------------|------------------------|------|-----------|-----|----------------------------|------------------------|------|-----------|----|
|                                        | Intervention group<br>n=119 | Control group<br>n=122 |      |           |     | Intervention<br>Group n=97 | Control group<br>n=108 |      |           |    |
| <b>Working times</b>                   |                             |                        |      |           |     |                            |                        |      |           |    |
| hrs/wk <sup>a</sup>                    | 34.4 (7.4) (6-50)           | 33.4 (9.1) (8-50)      |      |           | NS  | 33.6 (8.6) (4-48)          | 32.1 (9.5) (6-60)      |      |           | NS |
| days/wk <sup>a</sup>                   | 4.3 (0.8) (2-6)             | 4.1 (1) (1-7)          |      |           | NS  | 4.4 (0.1) (0-6)            | 4.2 (0.8) (0-6)        |      |           | NS |
| <b>Irregular working times</b>         |                             |                        |      |           |     |                            |                        |      |           |    |
| Evening shifts <sup>b</sup>            | 17 (14)                     | 18 (15)                |      |           | NS  | 12 (12)                    | 17 (16)                |      |           | NS |
| Nightshifts <sup>b</sup>               | 17 (12.4) (10.6)            | 17 (6.7) (12.3)        |      |           | NS  | 11 (22.3 (3.2))            | 14 (19.9 (2.2))        |      |           | NS |
|                                        | 18 (9) (7.5)                | 18 (3) (6.3)           |      |           | NS  | 2 (2.2 (1.9))              | 4 (2.7 (1.5))          |      |           | NS |
| <b>Physical work:</b>                  |                             |                        |      |           |     |                            |                        |      |           |    |
| Standing/ walking ≥ 4 hrs/day          | 37 (32)                     | 41 (35)                |      |           | NS  | 32 (32)                    | 33 (34)                |      |           | NS |
| Lifting/ carrying loads or people      | 33 (28)                     | 31 (25)                |      |           | NS  | 18 (19)                    | 20 (19)                |      |           | NS |
| <b>Physical work: regularly/ often</b> |                             |                        |      |           |     |                            |                        |      |           |    |
| Bending                                | 28 (24)                     | 25 (21)                |      |           | NS  | 19 (20)                    | 26 (24)                |      |           | NS |
| Squatting                              | 22 (19)                     | 23 (19)                |      |           | NS  | 17 (18)                    | 16 (15)                |      |           | NS |
| Repetitive motion                      | 40 (34)                     | 43 (35)                |      |           | NS  | 27 (28)                    | 25 (23)                |      |           | NS |
| Very physically demanding              | 24 (19)                     | 17 (14)                |      |           | NS  | 15 (16)                    | 17 (16)                |      |           | NS |
| Requiring physical strength            | 19 (16)                     | 14 (12)                |      |           | NS  | 14 (14)                    | 10 (9)                 |      |           | NS |
| Uncomfortable postures                 | 17 (14)                     | 9 (7)                  |      |           | NS  | 8 (10)                     | 8 (9)                  |      |           | NS |
| <b>Job Strain: often/always</b>        |                             |                        |      |           |     |                            |                        |      |           |    |
| Problems with the pressure             | 17 (14)                     | 32 (26)                | 0.55 | 0.32-0.91 | *   | 11 (11)                    | 17 (16)                |      |           | NS |
| Like to take things a little easier    | 23 (19)                     | 38 (31)                | 0.62 | 0.4-0.98  | *   | 23 (24)                    | 28 (26)                |      |           | NS |
| Freedom in performance of tasks        | 83 (70)                     | 93 (76)                |      |           | NS  | 61 (63)                    | 85 (79)                | 0.57 | 0.37-0.9  | *  |
| Influence on the pace                  | 57 (48)                     | 67 (55)                |      |           | NS  | 50 (52)                    | 60 (58)                |      |           | NS |
| Planning own work                      | 75 (63)                     | 77 (63)                |      |           | NS  | 59 (61)                    | 70 (65)                |      |           | NS |
| Support from manager                   | 66 (56)                     | 80 (66)                |      |           | NS  | 55 (57)                    | 67 (62)                |      |           | NS |
| Support colleagues                     | 87 (73)                     | 98 (80)                |      |           | NS  | 81 (84)                    | 90 (84)                |      |           | NS |
| Enjoy working                          | 93 (78)                     | 111 (91)               | 0.86 | 0.77-0.96 | **  | 76 (79)                    | 100 (93)               | 0.34 | 0.16-0.74 | ** |
| Work satisfying                        | 93 (78)                     | 113 (93)               | 0.84 | 0.76-0.94 | *** | 73 (75)                    | 98 (91)                | 0.37 | 0.19-0.74 | ** |
| <b>Biological agents</b>               |                             |                        |      |           |     |                            |                        |      |           |    |
| - Small and/ or sick children          | 36 (30)                     | 33 (27)                |      |           | NS  | 24 (35)                    | 29 (27)                |      |           | NS |
|                                        | 22 (16)                     | 18 (15)                |      |           | NS  | 20 (21)                    | 13 (12)                |      |           | NS |

|                                |         |         |    |         |         |    |
|--------------------------------|---------|---------|----|---------|---------|----|
| - Sick adults                  | 21 (18) | 18 (15) | NS | 19 (8)  | 17 (16) | NS |
| - Blood or other bodily fluids | 13 (11) | 14 (12) | NS | 11 (11) | 10 (9)  | NS |
| <b>Chemical agents</b>         | 9 (8)   | 7 (6)   | NS | 9 (9)   | 7 (7)   | NS |
| <b>Physical workload</b>       |         |         |    |         |         |    |
| - Heat                         | 22 (19) | 22 (18) | NS | 19 (20) | 17 (16) | NS |
| - Cold                         | 26 (22) | 17 (14) | NS | 15 (16) | 11 (10) | NS |
| - Noise                        | 40 (34) | 32 (26) | NS | 32 (33) | 31 (29) | NS |

\*  $P$  or  $FE < 0.05$ , \*\*  $P$  or  $FE < 0.01$ , \*\*\*  $P < 0.001$ .

<sup>a</sup> Mean (SD) (Min-max), <sup>b</sup> N, mean hrs/wk (SD) all other variables mentioned as N (%)

Abbreviations: NS not significant, ref=Reference
