# Supplementary figures and images for: Evaluation of a blended care programme for caregivers and working pregnant women to prevent adverse pregnancy outcomes: an intervention study
Source: HighWire-hosted journal article supplement (doi:10.1136/oemed-2020-107191), 2021-04-19

**Supplement B: Flow Chart of study population**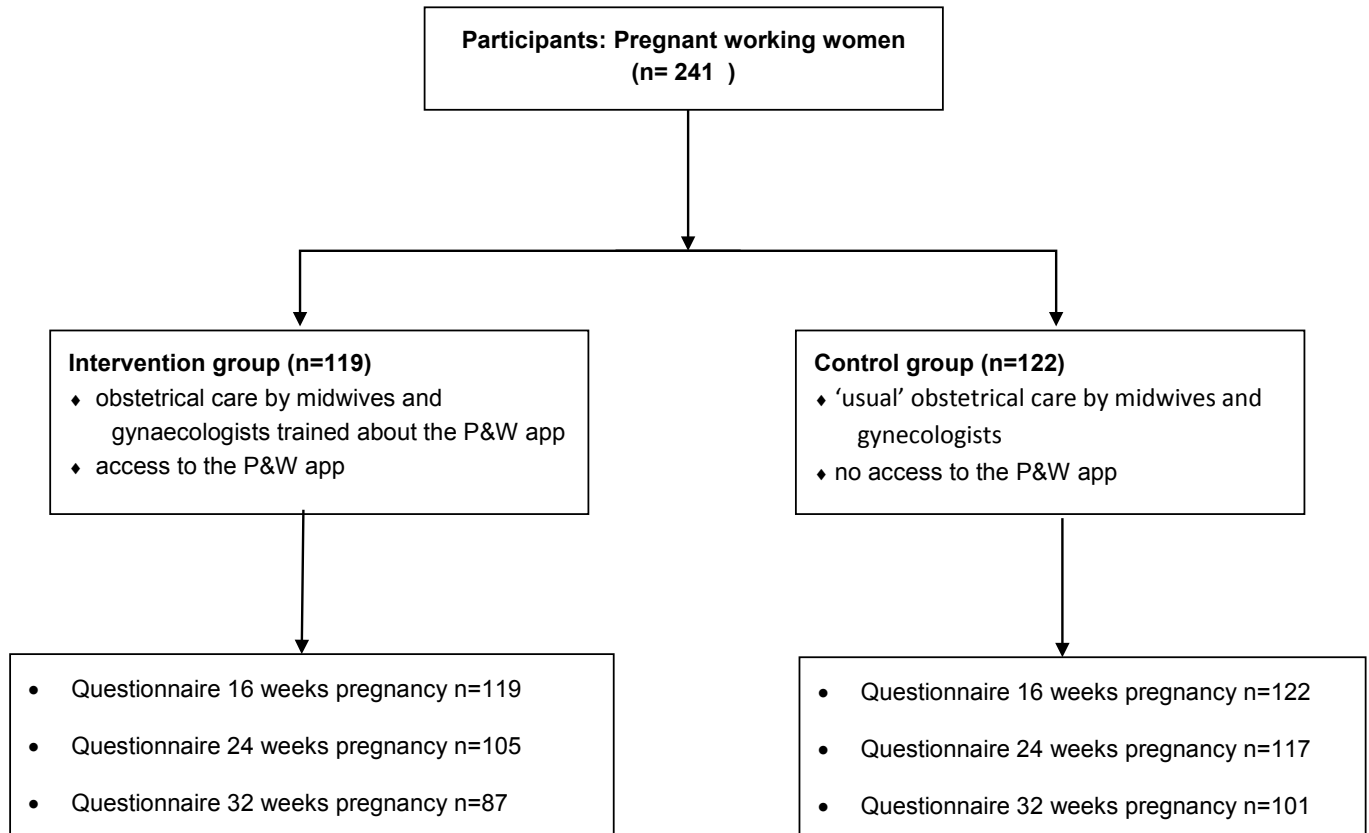

Supplement: oemed-2020-107191supp002_data_supplement.pdf [file oemed-2020-107191supp002_data_supplement.pdf]
